# Supplementary material
Source: PubMed Central journal article supplement (PMC3499333)

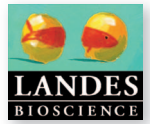

## **Supplemental Material to:**

**Robert A. Philibert, Steven R.H. Beach and Gene H. Brody**

**Demethylation of the aryl hydrocarbon receptor repressor  
as a biomarker for nascent smokers**

**Epigenetics 2012; Vol(11)**

**<http://dx.doi.org/10.4161/epi.22520>**

**<http://www.landesbioscience.com/journals/epigenetics/article/22520>**

# Quantile-Quantile plot

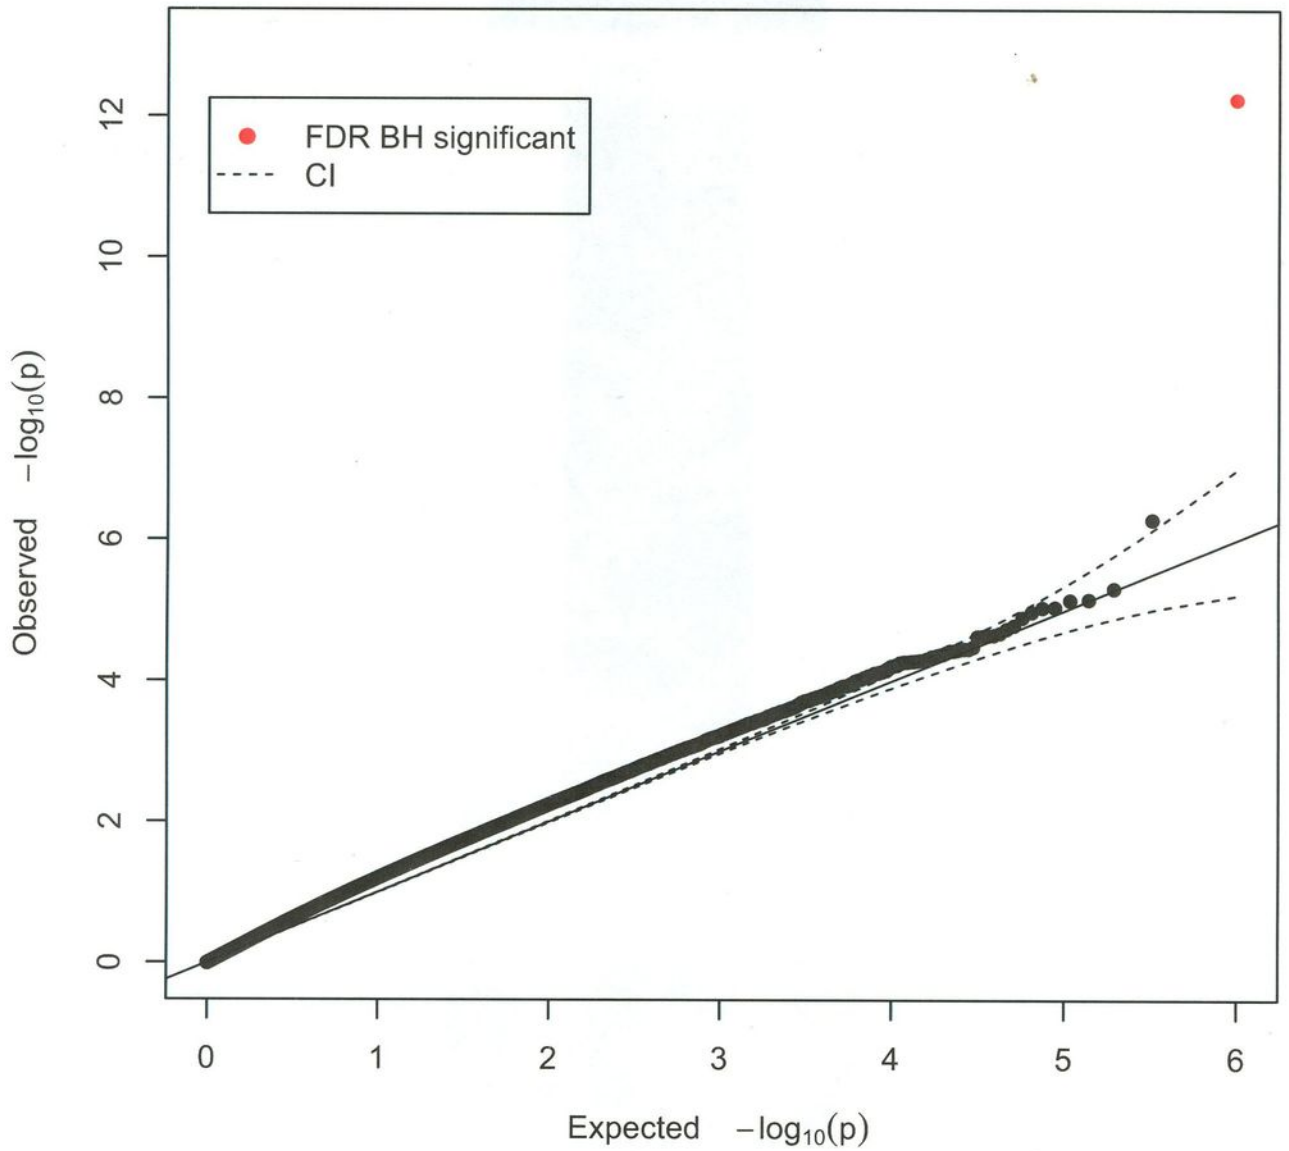

Supplement: epi-7-1331-s01.pdf [file epi-7-1331-s01.pdf]
